# Supplementary material for: Towards a Deeper Understanding: Utilizing Machine Learning to Investigate the Association between Obesity and Cognitive Decline—A Systematic Review
Source: MDPI journal article supplement (doi:10.3390/jcm13082307), 2024-04-16
Supplement: s1 [file s1]

Table S1: Syntax authors' searches in various databases.

| Database       | Search String                                                                                                                                                                                                                                                                 | N of Results |
|----------------|-------------------------------------------------------------------------------------------------------------------------------------------------------------------------------------------------------------------------------------------------------------------------------|--------------|
| Scopus         | ALL ( "OBESITY" AND<br>"COGNITIVE<br>DECLINE" AND<br>"DEMENTIA" AND<br>"MILD COGNITIVE<br>IMPAIRMENT" AND<br>"ALZHEIMER'S<br>DISEASE" AND<br>"ARTIFICIAL<br>INTELLIGENCE" AND<br>"MACHINE<br>LEARNING" )                                                                      | 52           |
| Pubmed         | ("Obesity"[All Fields]<br>OR "Adiposity"[All<br>Fields]) AND ("Mild<br>cognitive<br>impairment"[All Fields]<br>OR "Cognitive<br>decline"[All Fields] OR<br>"Dementia"[All Fields])<br>AND ("Artificial<br>intelligence"[All Fields]<br>OR "Machine<br>learning"[All Fields])" | 24           |
| Embase         | ('obesity'/exp OR<br>adiposity) AND ((mild<br>AND cognitive AND<br>'impairment'/exp OR<br>cognitive) AND<br>'decline'/exp OR<br>'dementia'/exp) AND<br>(artificial AND<br>'intelligence'/exp OR<br>machine) AND<br>'learning'/exp                                             | 4            |
| Web of Science | TS=(obesity OR adipose<br>tissue) AND TS=(mild<br>cognitive impairment<br>OR cognitive decline OR<br>dementia) AND<br>TS=(artificial<br>intelligence OR machine<br>learning)                                                                                                  | 25           |
| PsycInfo       | obesity AND Any Field:<br>cognitive decline OR<br>Any Field: dementia<br>AND Abstract: machine<br>learning OR Abstract:                                                                                                                                                       | 94           |

|          |                                                                                                                                                                              |   |
|----------|------------------------------------------------------------------------------------------------------------------------------------------------------------------------------|---|
|          | artificial intelligence<br>AND Population Group:<br>Human AND Peer-<br>Reviewed Journals only                                                                                |   |
| Cochrane | OBESITY in Keyword<br>AND COGNITIVE<br>DECLINE in Keyword<br>OR DEMENTIA in<br>Keyword AND<br>ARTIFICIAL<br>INTELLIGENCE in<br>Keyword AND<br>MACHINE LEARNING<br>in Keyword | 1 |
